# Supplementary material for: Potassium Dehydroandrograpolide Succinate Targets NRP1 Mediated VEGFR2/VE-Cadherin Signaling Pathway to Promote Endothelial Barrier Repair
Source: MDPI journal article supplement (doi:10.3390/ijms24043096), 2023-02-04
Supplement: s1 [file s1]

Supplementary

# Potassium Dehydroandrograpolid Succinate Targets NRP1 Mediated VEGFR2/VE-Cadherin Signaling Pathway to Promote Endothelial Barrier Repair

Zheng Wang <sup>†</sup>, Xiao Wu <sup>†</sup>, Jiali Li, Qiru Guo, Zhong Jin, Hongfei Li, Bing Liang, Wangming Hu, Huan Xu, Liangqin Shi, Lan Yang and Yong Wang <sup>\*</sup>

College of Basic Medicine, Chengdu University of Traditional Chinese Medicine, Chengdu, China

<sup>\*</sup> Correspondence: wangyong@cdutcm.edu.cn

<sup>†</sup> These authors contributed equally to this work.

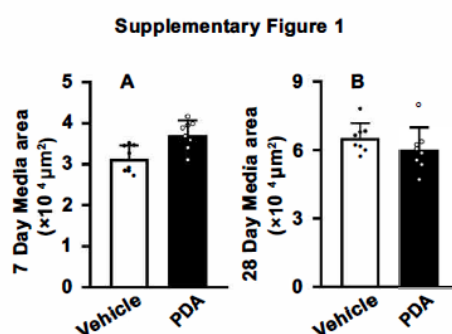

**Figure S1. Analysis the media layer areas of carotid arteries after injury for 7 days and 28 days:** (A) PDA (20 mg/kg) was administered by intraperitoneal injection for 7 consecutive days. The media layer area of the PDA group and the vehicle group was measured using Image J software (n = 8). (B) PDA (20 mg/kg) was administered by intraperitoneal injection for 28 consecutive days. The media layer area of the PDA and the vehicle group was measured using Image J software (n = 8). Data presented as mean ± SEM.

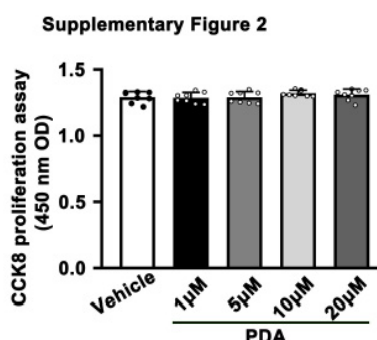

**Figure S2. PDA treatment did not affect HUVEC-C viability:**  $1.5 \times 10^3$  HUVEC-Cs was seeded in 96-well culture plate, absorbance at 450 nm was evaluated using Cell Counting Kit-8 after PDA (1 μM, 5 μM, 10 μM, 20 μM) treatment for 12 hours (n = 8). Data presented as mean ± SEM. \* P < 0.05.

### Supplementary Figure 4

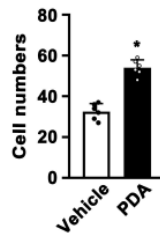

2

**Supplementary Figure 7**

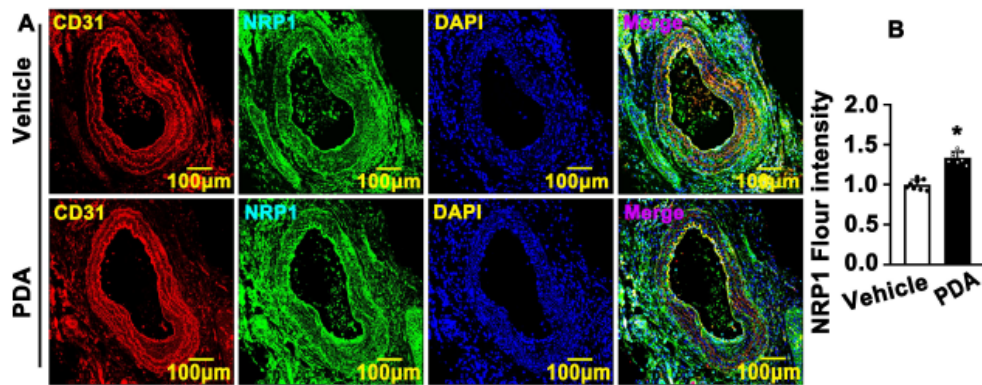

**Figure S7. PDA promotes expression of NRP1 in carotid endothelial cells:** (A) IF staining was performed against NRP1 antibody on the left carotid artery partial ligation model following PDA treatment for 28 days, and the quantification data was evaluated in (B) (n = 8). Data presented as mean ± SEM. \* P < 0.05.

**Supplementary Figure 8**

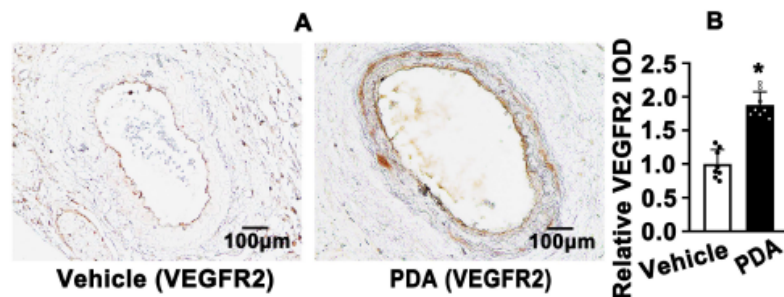

**Figure S8. PDA promotes expression of VEGFR2 in carotid endothelial cells:** (A) IF staining was performed to detect expression of VEGFR2 in the partially ligated carotid arteries. (B) The quantitative of VEGFR2 expression (n = 8). Data presented as mean ± SEM. \* P < 0.05.

**Supplementary Figure 9**

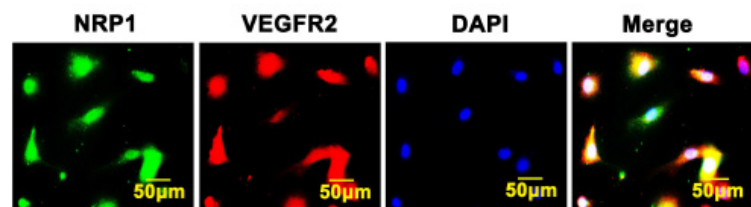

**Figure S9. Co-expression of NRP1 and VEGFR2 in HUVECs:** IF staining performed against NRP1 and VEGFR2 antibodies to determine whether co-localization expression of NRP1 and VEGFR2 in HUVECs.

Supplementary Figure 10

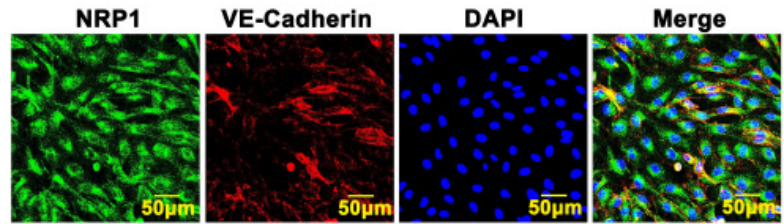

**Figure S10. Co-expression of NRP1 and VE-Cad in HUVECs:** IF staining performed against NRP1 and VE-Cad antibodies to determine whether co-localization expression of NRP1 and VE-Cad in HUVECs.

Supplementary Figure 11

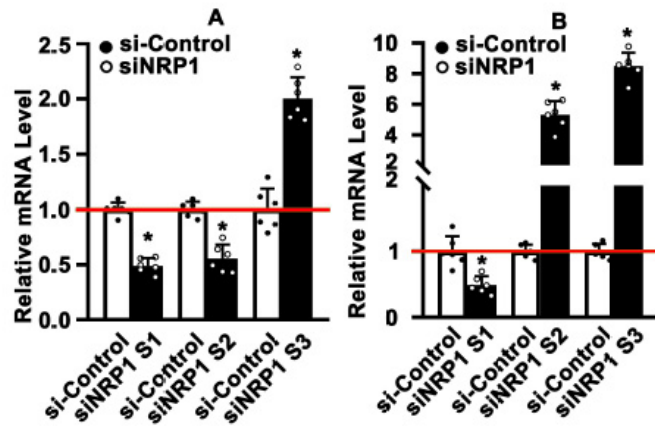

**Figure S11. Knockdown of NRP1 in HUVEC and HUVEC-C by siRNA transfection:** HUVECs (A) and HUVEC-Cs (B) were transfected with si-control or siRNA targeting NRP1, Real Time PCR performed to validate NRP1 deletion efficiency after transfection at 48 hours. S1 siRNA sequence was chosen for further studies. Data presented as mean  $\pm$  SEM. \* P < 0.05.

Supplementary Figure 12

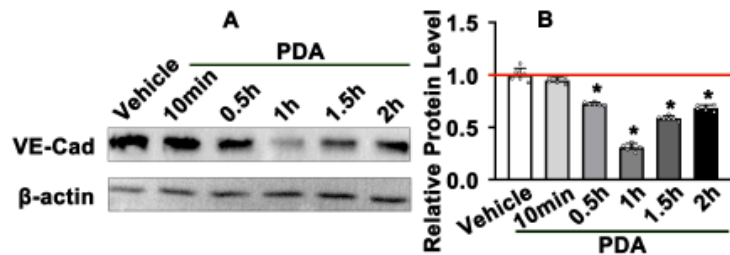

**Figure S12. Dynamically expression of VE-Cad in HUVEC following PDA treatment:** (A) Western blot was performed to determine the expression of VE-Cad in HUVECs after PDA (10  $\mu$ M) treatment for different time points, and the quantification data are shown in (B) (n = 6). Data presented as mean  $\pm$  SEM. \* P < 0.05.

**Table S1. List of primer sequences used for Real Time PCR.**

| <i>Gene Name</i> | <i>Species</i> | <i>Sequence</i>                   |
|------------------|----------------|-----------------------------------|
| IL-6             | Human          | F:5'-GGAGACTTGCCTGGTGAAAA-3'      |
| IL-6             | Human          | R:5'-GTCAGGGGTGGTTATTGCAT-3'      |
| vWF              | Human          | F:5'-GTCGAGCTGCACAGTGACATG-3'     |
| vWF              | Human          | R:5'-GCACCATAAACGTTGACTTCCA-3'    |
| VCAM1            | Human          | F:5'-TCAGATTGGAGACTCAGTCATGT-3'   |
| VCAM1            | Human          | R:5'-ACTCCTCACCTTCCCCGCTC-3'      |
| ICAM1            | Human          | F:5'-GGCCGGCCAGCTTATACAC-3'       |
| ICAM1            | Human          | R:5'-TAGACACTTGAGCTCGGGCA-3'      |
| MCP1             | Human          | F:5'-TGCAGAGGCTCGCGAGCTA-3'       |
| MCP1             | Human          | R:5'-CAGGTGGTCCATGGAATCCTGA-3'    |
| E-selection      | Human          | F:5'-CCCGAAGGGTTTGGTGAG-3'        |
| E-selection      | Human          | R:5'-TAAAGCCCTCATTGCATTGA-3'      |
| PCNA             | Human          | F:5'-TCCGCCACCATGTTCTGA-3'        |
| PCNA             | Human          | R:5'-TATCCCAGCAGGCCTCGTT-3'       |
| P14arf           | Human          | F:5'-ATGGTGCGCAGGTTCTTGG-3'       |
| P14arf           | Human          | R:5'-TGCGGGCATGGTTACTGCCTC-3'     |
| P15ink4b         | Human          | F:5'-CGCAGACCCTGCCACTCT-3'        |
| P15ink4b         | Human          | R:5'-AGGCATCGCGCACGTC-3'          |
| P18ink4c         | Human          | F:5'-CATCATGCAGCCTGGTTAGG-3'      |
| P18ink4c         | Human          | R:5'-GCTGGCCGTGTGCTTCAC-3'        |
| P19arf           | Human          | F:5'-CCCTCGTGCTGAGCTACTGA-3'      |
| P19arf           | Human          | R:5'-ACCACCAGCGTGTCCAGGAA-3'      |
| P27kip1          | Human          | F:5'-TGGAGAAGCACTGCAGAGAC-3'      |
| P27kip1          | Human          | R:5'-GCGTGTCTCTCAGAGTTAGCC-3'     |
| CCND1            | Human          | F:5'-GTGCTGCGAAGTGGAAACC-3'       |
| CCND1            | Human          | R:5'-ATCCAGGTGGCGACGATCT-3'       |
| Collagen1        | Human          | F:5'-ATGCCTGGTGAACGTGGT-3'        |
| Collagen1        | Human          | R:5'-AGGAGAGCCATCAGCACCT-3'       |
| MMP-2            | Human          | F:5'-TGGCGATGGATACCCCTTT-3'       |
| MMP-2            | Human          | R:5'-TTCTCCCAAGGTCCATAGCTCAT-3'   |
| MMP-9            | Human          | F:5'-CCTGGGCAGATTCCAAACCT-3'      |
| MMP-9            | Human          | R:5'-GCAAGTCTTCCGAGTAGTTTTGGAT-3' |
| Has1             | Human          | F:5'-GGAATAACCTCTTGCAGCAGTTTC-3'  |
| Has1             | Human          | R:5'-GCCGGTCATCCCCAAAAG-3'        |
| Has2             | Human          | F:5'-TCGCAACACGTAACGCAAT-3'       |
| Has2             | Human          | R:5'-ACTTCTCTTTTCCACCCCATTT-3'    |
| Has3             | Human          | F:5'-AACAAGTACGACTCATGGATTTCCT-3' |
| Has3             | Human          | R:5'-GCCCCTCCACGTTGA-3'           |
| Versican 0       | Human          | F:5'-GACCTCAGGCGCTTTC-3'          |
| Versican 0       | Human          | R:5'-CAGTGGTAACGAGATGCTTC-3'      |
| Versican 1       | Human          | F:5'-GCGCCACCCTGTGAC-3'           |
| Versican 1       | Human          | R:5'-CAGTGGTAACGAGATGCTTC-3'      |
| Versican 2       | Human          | F:5'-GACCTCAGGCGCTTTC-3'          |
| Versican 2       | Human          | R:5'-TAGCACTGCCCTTGGA-3'          |
| VE-Cadherin      | Human          | F:5'-GAGCCGCCGCCGCGCAGGAAG-3'     |
| VE-Cadherin      | Human          | R:5'-CGTGAGCATCCAGCAGTGGTAGC-3'   |
| Integrin         | Human          | F:5'-TGGGCTACGGGCAGGAG-3'         |
| Integrin         | Human          | R:5'-CAGCATTAACAGCAACAATCCG-3'    |
| Fibronectin      | Human          | F:5'-CCGCCGAATGTAGGACAAGA-3'      |

|             |       |                                   |
|-------------|-------|-----------------------------------|
| Fibronectin | Human | R:5'-TGCCAACAGGATGACATGAAA-3'     |
| NRP1        | Human | F:5'-CAGAAAAGCCACGGTCAT-3'        |
| NRP1        | Human | R:5'-CAGCCAAATTCACAGTTAAAACC-3'   |
| NRP2        | Human | F:5'-AAGTCTCCTACAGCCTAACCG-3'     |
| NRP2        | Human | R:5'-GATGTCAGGGGTGTCATAGTGC-3'    |
| Tie2        | Human | F:5'-TTGAAGTGGAGAGAAGGTCTG-3'     |
| Tie2        | Human | R:5'-GTTGACTCTAGCTCGGACCAC-3'     |
| eNOs        | Human | F:5'-TGATGGCGAAGCGAGTGAAG-3'      |
| eNOs        | Human | R:5'-ACTCATCCATACACAGGACCC-3'     |
| GJC1        | Human | F:5'-AGCTGTAGGAAGGAGAATCCATC-3'   |
| GJC1        | Human | R:5'-TGCAAACGCATCATAACAGACA-3'    |
| EFNB2       | Human | F:5'-TTCGACAACAAGTCCCTTTG-3'      |
| EFNB2       | Human | R:5'-GATGTTGTTCCCCGAATGTC-3'      |
| F3          | Human | F:5'-CCACTACAAATACTGTGGCAG-3'     |
| F3          | Human | R:5'-TCCAATCTCCTGACTTAGTG-3'      |
| RHOA        | Human | F:5'-GAAGAGGCTGGACTCGGATT-3'      |
| RHOA        | Human | R:5'-AGCAAGCATGTCTTTCCACA-3'      |
| Jagged1     | Human | F:5'-CAGGACCTGGTTAACGGATTT-3'     |
| Jagged1     | Human | R:5'-GCCTCACATTTGCATC-3'          |
| VEGFR1      | Human | F:5'-TCTCACACATCGACAAACCAATACA-3' |
| VEGFR1      | Human | R:5'-GGTAGCAGTACAATTGAGGACAAGA-3' |
| VEGFR2      | Human | F:5'-GCAGGGGACAGAGGGACTTG-3'      |
| VEGFR2      | Human | R:5'-GAGGCCATCGCTGCACTCA-3'       |
| VEGFR3      | Human | F:5'-GACAGCTACAAGTACGAGCATCTG-3'  |
| VEGFR3      | Human | R:5'-CGTTCTTGCAGTCGAGCAGAA-3'     |
| VEGF121     | Human | F:5'-CCCTGATGAGATCGAGTACATCTT-3'  |
| VEGF121     | Human | R:5'-GCCTCGGCTTGTACATTTT-3'       |
| VEGF165     | Human | F:5'-CCCTGATGAGATCGAGTACATCTT-3'  |
| VEGF165     | Human | R:5'-AGCAAGGCCACAGGGATTT-3'       |
| VEGF189     | Human | F:5'-CCCTGATGAGATCGAGTACATCTT-3'  |
| VEGF189     | Human | R:5'-AACGCTCCAGGACTTATACCG-3'     |

**Table S2.** The sequences used for siRNA.

| <i>Gene Name</i> | <i>Species</i> | <i>Sequence</i>                |
|------------------|----------------|--------------------------------|
| NRP1-Homo-476    | Human          | S:5'-CAGAGAAUUAUGAUCAACUTT-3'  |
| NRP1-Homo-476    | Human          | AS:5'-AGUUGAUCAUAAUUCUCUGTT-3' |
